# Supplementary material
Source: PubMed Central journal article supplement (PMC9516592)
Supplement: jcsm.10114.sm001.pdf [file jcsm.10114.sm001.pdf]

**Table S1:** Association of ICS with sleep parameters in obese and healthy-weight children with asthma.

| Variable                           | Obese Asthma   |                  |          | Healthy-weight Asthma |                  |          |
|------------------------------------|----------------|------------------|----------|-----------------------|------------------|----------|
|                                    | ICS<br>(n=214) | No ICS<br>(n=75) | <i>P</i> | ICS<br>(n=125)        | No ICS<br>(n=29) | <i>P</i> |
| SE (%)                             | 82.67 ± 12.9   | 77.49 ± 18.1     | 0.03     | 86.00 ± 9.21          | 80.17 ± 16.45    | 0.12     |
| AAI <sup>a</sup>                   | 12.76 ± 8.06   | 14.95 ± 11.08    | 0.18     | 11.23 ± 5.99          | 14.37 ± 8.17     | 0.01     |
| % time in N1                       | 6.82 ± 4.51    | 10.51 ± 10.52    | 0.01     | 5.5 ± 3.4             | 6.91 ± 3.4       | 0.03     |
| % time N2                          | 47.68 ± 11.53  | 47.08 ± 12.14    | 0.7      | 44.95 ± 9.82          | 43.09 ± 9.08     | 0.35     |
| % time in N3                       | 28.89 ± 11.95  | 25.77 ± 12.96    | 0.059    | 30.85 ± 9.84          | 31.41 ± 8.87     | 0.78     |
| % time in REM                      | 17.17 ± 6.31   | 16.89 ± 6.92     | 0.74     | 18.75 ± 5.95          | 18.92 ± 6.74     | 0.89     |
| PLMI <sup>a</sup>                  | 17.14 ± 31.00  | 22.7 ± 44.98     | 0.61     | 28.46 ± 48.19         | 29.86 ± 39.93    | 0.33     |
| AHI <sup>a</sup>                   | 4.75 ± 10.51   | 9.4 ± 15.57      | 0.003    | 2.71 ± 5.24           | 4.95 ± 7.31      | 0.05     |
| OSA                                | 84 (39.3)      | 43 (57.3)        | 0.002    | 46 (36.8)             | 14 (48.3)        | 0.19     |
| Baseline O <sub>2</sub> saturation | 97.87 ± 3.37   | 98.11 ± 1.84     | 0.57     | 98.54 ± 1.39          | 98.9 ± 1.4       | 0.21     |
| O <sub>2</sub> saturation nadir    | 89.92 ± 7.96   | 87.5 ± 11.42     | 0.047    | 90.83 ± 8.33          | 90.03 ± 5.27     | 0.63     |
| Baseline ETCO <sub>2</sub>         | 41.08 ± 5.10   | 41.55 ± 5.79     | 0.7      | 40.09 ± 5.5           | 39.65 ± 7.24     | 0.64     |
| Peak ETCO <sub>2</sub>             | 48.62 ± 6.31   | 49.76 ± 5.18     | 0.14     | 48.58 ± 5.99          | 49.77 ± 6.8      | 0.43     |

Sleep variables are reported as mean ± standard deviation except OSA reported as proportion, n (%).

<sup>a</sup> Reported in events/h.

SE: sleep efficiency; AAI: arousal awakening index; PLMI: periodic limb movement index; AHI: apnea-hypopnea index; ETCO<sub>2</sub>: end-tidal CO<sub>2</sub>.

**Table S2:** Association of Montelukast with sleep parameters in obese and healthy-weight children with asthma.

| Variable                           | Obese Asthma           |                           |          | Healthy-weight Asthma |                          |          |
|------------------------------------|------------------------|---------------------------|----------|-----------------------|--------------------------|----------|
|                                    | Montelukast<br>(n=174) | No Montelukast<br>(n=115) | <i>P</i> | Montelukast (n=92)    | No Montelukast<br>(n=62) | <i>P</i> |
| SE (%)                             | 83.89 ± 10.27          | 77.44 ± 18.68             | <0.001   | 85.32 ± 10.89         | 84.23 ± 11.5             | 0.57     |
| AAI <sup>a</sup>                   | 12.34 ± 7.94           | 14.77 ± 10.22             | 0.02     | 11.38 ± 4.81          | 12.50 ± 8.41             | 0.72     |
| % time in N1                       | 6.92 ± 5.04            | 9.09 ± 8.67               | 0.02     | 5.35 ± 3.36           | 6.4 ± 3.5                | 0.03     |
| % time N2                          | 46.59 ± 11.43          | 48.93 ± 11.96             | 0.1      | 44.76 ± 10.49         | 44.35 ± 8.42             | 0.8      |
| % time in N3                       | 30 ± 12.29             | 25.2 ± 11.74              | 0.001    | 31.28 ± 10.27         | 30.47 ± 8.67             | 0.61     |
| % time in REM                      | 17.28 ± 6.48           | 16.82 ± 6.46              | 0.55     | 18.79 ± 6.12          | 18.77 ± 6.07             | 0.98     |
| PLMI <sup>a</sup>                  | 19.02 ± 37.90          | 17.96 ± 30.72             | 0.58     | 30.27 ± 47.88         | 26.44 ± 45.01            | 0.86     |
| AHI <sup>a</sup>                   | 4.46 ± 9.83            | 8.05 ± 14.62              | 0.02     | 2.66 ± 4.77           | 3.8 ± 6.87               | 0.88     |
| OSA                                | 65 (37.4%)             | 62 (54%)                  | 0.01     | 37 (40.2)             | 23 (37.1)                | 0.71     |
| Baseline O <sub>2</sub> saturation | 98.28 ± 1.59           | 97.41 ± 4.4               | 0.02     | 98.64 ± 1.45          | 98.55 ± 1.32             | 0.71     |
| O <sub>2</sub> saturation nadir    | 90.14 ± 8.47           | 88.01 ± 9.7               | 0.05     | 90.02 ± 9.45          | 91.61 ± 4.53             | 0.22     |
| Baseline ETCO <sub>2</sub>         | 40.28 ± 5.62           | 42.55 ± 4.48              | 0.001    | 40.07 ± 5.89          | 39.91 ± 5.87             | 0.94     |
| Peak ETCO <sub>2</sub>             | 48.14 ± 6.02           | 50.08 ± 5.89              | <0.001   | 48.55 ± 6.34          | 49.18 ± 5.9              | 0.52     |

Sleep variables are reported as mean ± standard deviation except OSA reported as proportion, n (%).

<sup>a</sup> Reported in events/h.

SE: sleep efficiency; AAI: arousal awakening index; PLMI: periodic limb movement index; AHI: apnea-hypopnea index; ETCO<sub>2</sub>: end-tidal CO<sub>2</sub>.

**Table S3:** Association of nasal steroids with sleep parameters in obese and healthy-weight children with asthma.

| Variable                           | Obese Asthma         |                          |          | Healthy-weight Asthma |                          |          |
|------------------------------------|----------------------|--------------------------|----------|-----------------------|--------------------------|----------|
|                                    | Nasal steroid (n=89) | No nasal steroid (n=200) | <i>P</i> | Nasal steroid (n=44)  | No nasal steroid (n=110) | <i>P</i> |
| SE (%)                             | 80.47 ± 14.41        | 81.7 ± 14.62             | 0.47     | 84.53 ± 12.59         | 85.05 ± 10.53            | 0.78     |
| AAI <sup>a</sup>                   | 14.73 ± 11.12        | 12.76 ± 7.89             | 0.33     | 10.63 ± 3.87          | 12.31 ± 7.3              | 0.31     |
| % time in N1                       | 8.14 ± 7.94          | 7.62 ± 6.23              | 0.38     | 5.45 ± 3.26           | 5.89 ± 3.51              | 0.41     |
| % time N2                          | 45.11 ± 11.5         | 48.59 ± 11.62            | 0.02     | 46.26 ± 9.3           | 43.93 ± 9.79             | 0.18     |
| % time in N3                       | 30.14 ± 13.29        | 27.16 ± 11.72            | 0.056    | 29.94 ± 9.08          | 31.36 ± 9.87             | 0.41     |
| % time in REM                      | 16.78 ± 7.29         | 17.24 ± 6.07             | 0.57     | 18.99 ± 5.56          | 18.69 ± 6.31             | 0.78     |
| PLMI <sup>a</sup>                  | 20.03 ± 40.27        | 17.96 ± 32.73            | 0.80     | 23.36 ± 39.66         | 30.87 ± 49.15            | 0.21     |
| AHI <sup>a</sup>                   | 8.73 ± 15.6          | 4.64 ± 9.94              | 0.07     | 3.55 ± 5.34           | 2.95 ± 5.84              | 0.18     |
| Baseline O <sub>2</sub> saturation | 97.3 ± 4.81          | 98.2 ± 1.77              | 0.07     | 98.82 ± 1.08          | 98.52 ± 1.49             | 0.47     |
| O <sub>2</sub> saturation nadir    | 87.68 ± 12.09        | 90 ± 7.21                | 0.6      | 92.07 ± 8.54          | 90.14 ± 7.51             | 0.01     |
| Baseline ETCO <sub>2</sub>         | 41.98 ± 5.17         | 40.86 ± 5.32             | 0.16     | 41.0 ± 5.4            | 39.59 ± 6.01             | 0.24     |
| Peak ETCO <sub>2</sub>             | 48.95 ± 6.19         | 48.93 ± 5.98             | 0.97     | 48.68 ± 6.35          | 48.87 ± 6.09             | 0.84     |

Sleep variables are reported as mean ± standard deviation.

<sup>a</sup> Reported in events/h.

SE: sleep efficiency; AAI: arousal awakening index; PLMI: periodic limb movement index; AHI: apnea-hypopnea index; ETCO<sub>2</sub>: end-tidal CO<sub>2</sub>.

**Table S4:** Association of antihistamine with sleep parameters in obese and healthy-weight children with asthma.

| Variable                               | Obese Asthma                |                                    |          | Healthy-weight Asthma       |                                    |          |
|----------------------------------------|-----------------------------|------------------------------------|----------|-----------------------------|------------------------------------|----------|
|                                        | Antihistamine use<br>(n=69) | No Antihistamine<br>use<br>(n=220) | <i>P</i> | Antihistamine use<br>(n=50) | No Antihistamine<br>use<br>(n=104) | <i>P</i> |
| SE (%)                                 | 81.87 ± 13.53               | 81.15 ± 14.87                      | 0.9      | 83.43 ± 11.77               | 85.62 ± 10.77                      | 0.27     |
| AAI <sup>a</sup>                       | 12.53 ± 10.08               | 13.59 ± 8.69                       | 0.19     | 10.85 ± 5.18                | 12.3 ± 7.09                        | 0.19     |
| % time in N1                           | 7.04 ± 4.95                 | 8.01 ± 7.27                        | 0.65     | 5.95 ± 3.35                 | 5.69 ± 3.5                         | 0.77     |
| % time N2                              | 48.7 ± 12.86                | 47.16 ± 11.3                       | 0.34     | 45.75 ± 9.48                | 44.04 ± 9.78                       | 0.31     |
| % time in N3                           | 26.19 ± 10.25               | 28.67 ± 12.81                      | 0.14     | 30.04 ± 9.14                | 31.39 ± 9.88                       | 0.42     |
| % time in REM                          | 18.06 ± 6.63                | 16.8 ± 6.4                         | 0.16     | 18.77 ± 4.68                | 18.79 ± 6.68                       | 0.99     |
| PLMI <sup>a</sup>                      | 20.81 ± 50.03               | 17.9 ± 29.1                        | 0.74     | 22.5 ± 39.73                | 31.72 ± 49.51                      | 0.11     |
| AHI <sup>a</sup>                       | 3.82 ± 8.36                 | 6.56 ± 13                          | 0.2      | 2.66 ± 5.52                 | 3.33 ± 5.81                        | 0.55     |
| Baseline O <sub>2</sub> saturation (%) | 98.05 ± 1.69                | 97.9 ± 3.37                        | 0.6      | 98.57 ± 1.4                 | 98.62 ± 1.4                        | 0.75     |
| O <sub>2</sub> saturation nadir        | 91.1 ± 7.04                 | 88.71 ± 9.52                       | 0.03     | 90.98 ± 8.34                | 90.53 ± 7.62                       | 0.14     |
| Baseline ETCO <sub>2</sub>             | 41.67 ± 4.99                | 41.07 ± 5.39                       | 0.46     | 40.1 ± 5.23                 | 39.96 ± 6.14                       | 0.77     |
| Peak ETCO <sub>2</sub>                 | 47.16 ± 5.74                | 49.48 ± 6.03                       | 0.006    | 48.3 ± 6.12                 | 49.04 ± 6.17                       | 0.52     |

Sleep variables are reported as mean ± standard deviation.

<sup>a</sup> Reported in events/h.

SE: sleep efficiency; AAI: arousal awakening index; PLMI: periodic limb movement index; AHI: apnea-hypopnea index; ETCO<sub>2</sub>: end-tidal CO<sub>2</sub>.
